# Supplementary material for: A new CcpA binding site plays a bidirectional role in carbon catabolism in Bacillus licheniformis
Source: PubMed Central journal article supplement — iScience. 2021 Apr 7;24(5):102400. doi: 10.1016/j.isci.2021.102400 (PMC8091064; doi:10.1016/j.isci.2021.102400), 2021-04-07
Supplement: mmc1.pdf [file mmc1.pdf]

iScience, Volume 24

## Supplemental information

### **A new CcpA binding site plays a bidirectional role in carbon catabolism in *Bacillus licheniformis***

**Fengxu Xiao, Youran Li, Yupeng Zhang, Hanrong Wang, Liang Zhang, Zhongyang Ding, Zhenghua Gu, Sha Xu, and Guiyang Shi**

## Supplementary Information

### A newly CcpA binding site plays a bidirectional role in carbon catabolism in *Bacillus licheniformis*

Fengxu Xiao<sup>a,b,c</sup>, Youran Li<sup>a,b,c\*</sup>, Yupeng Zhang<sup>a,b,c</sup>, Hanrong Wang<sup>a,b,c</sup>, Liang Zhang<sup>a,b,c</sup>, Zhongyang Ding<sup>a,b,c</sup>, Zhenghua Gu<sup>a,b,c</sup>, Sha Xu<sup>a,b,c</sup>, Guiyang Shi<sup>a,b,c,d\*</sup>

<sup>a</sup>Key Laboratory of Industrial Biotechnology, Ministry of Education, School of Biotechnology, Jiangnan University, Wuxi 214122, People's Republic of China;

<sup>b</sup>National Engineering Laboratory for Cereal Fermentation Technology, Jiangnan University, 1800 Lihu Avenue, Wuxi, Jiangsu Province 214122, People's Republic of China;

<sup>c</sup>Jiangsu Provincial Research Center for Bioactive Product Processing Technology, Jiangnan University.

<sup>d</sup>Lead contact

\*Address Correspondence to:

**Youran Li**, Jiangnan University, Wuxi, China. Email: [liyouran@jiangnan.edu.cn](mailto:liyouran@jiangnan.edu.cn)

or:

**Guiyang Shi**, Jiangnan University, Wuxi, China. Email: [gyshi@jiangnan.edu.cn](mailto:gyshi@jiangnan.edu.cn)

Legends:

|                                                                                                   |    |
|---------------------------------------------------------------------------------------------------|----|
| Transparent Methods                                                                               | 2  |
| Figure S1: EMSA of CcpA or CcpA-Hpr-P protein for fragment A and B                                | 3  |
| Figure S2: EMSA of CcpA protein binding to two fragments (cre4-1, cre4-2) labelled with 5'-biotin | 4  |
| Figure S3: Further point mutation of the 12-bp symmetrical region of CRE <sub>Tre</sub>           | 5  |
| Figure S4: Further point mutation of the 12-bp symmetrical region of CRE <sub>Tre(R)</sub>        | 6  |
| Figure S5: Potential CRE <sub>Tre</sub> sites in xylose operon and mannose operon                 | 7  |
| Table S1: Bacterial strains and plasmids used in this study                                       | 8  |
| Table S2: Primers used to construct recombinant plasmids                                          | 10 |

## Transparent Methods

### Bacterial Strains, Plasmids, and Culture Conditions

Table S1 lists the strains and plasmids used or produced in this study. *Escherichia coli* JM109 was used for plasmid preparation. The *E. coli* JM109 transformants carrying plasmids based on pHY-PLK300, were selected on Luria–Bertani (LB) agar plates supplemented with ampicillin (100 µg/mL). The *B. licheniformis* B1391 transformants were selected on LB agar plates supplemented with tetracycline (20 µg/mL). Two strains were cultured in LB medium (10 g/L tryptone, 5 g/L yeast extract, 10 g/L NaCl), *E. coli* was cultured at 37 °C and 200 rpm, and *B. licheniformis* was cultured at 37 °C and 250 rpm. Fermentation medium (12 g/L tryptone, 24 g/L yeast extract, 16.427 g/L K<sub>2</sub>HPO<sub>4</sub>·3H<sub>2</sub>O, 2.31 g/L KH<sub>2</sub>PO<sub>4</sub>) was prepared for protein expression. A 3% seed liquid was inoculated into the fermentation medium, and batch fermentation was cultured at 37 °C and 250 rpm.

### Plasmid Construction

The recombinant plasmids were constructed based on pHY300-PLK using the primers listed in Table S2. First, eGFP was amplified by the primer pair eGFP-F/eGFP-R (Table S2). The fragment was then purified and digested with *Xho*I and *Sma*I, followed by incorporation into pHY300-PLK, yielding pE. Then, the promoter region, *PtreA*, was cloned using 100 ng of the genome of *Bacillus licheniformis* CICIM B1391. PCR was performed with high-fidelity DNA polymerase (Vazyme Biotech Co., Ltd. 2 × Phanta Master Mix) and the primer pairs *PtreA*-F/*PtreA*-R. The fragment was also purified and digested with *Hind*III and *Xho*I, followed by incorporation into pE, yielding pBLTE. Next, the artificial promoter *PtreA* was constructed using overlap extension PCR. Two fragments, *PtreA*-CRETre-1 and *PtreA*-CRETre-2, were cloned by the primer pairs *PtreA*-F/ *PtreA*-CRETre-R, *PtreA*-CRETre-F/ *PtreA*-R, using *PtreA* as template. *PtreA*-CRETre was created using *PtreA*-CRETre-1 and *PtreA*-CRETre-2 as a template, and *PtreA*-F/*PtreA*-R as primers. The fragment *PtreA*-CRETre was also purified and digested with *Hind*III and *Xho*I, followed by incorporation into pE, yielding pBLT1E. pBLT2E was constructed according to the construction method of pBLT1E.

### Transformation of *B. licheniformis*

A method of electrotransformation was used to transform plasmids into *B. licheniformis*. A total of 8 µg–10 µg of plasmid was added to the *B. licheniformis* competent cells and mixed. Then, the mixed competent cells were added to a precooled 0.1 cm Gene Pulser cuvette and placed on ice for 5 min. Next, the 0.1 cm Gene Pulser cuvette was placed into an electroporation apparatus and shocked with 2,100 V. After the electric shock was administered, 900 µL of recovery medium (LB + 0.5 M sorbitol + 0.38 M mannitol) was immediately added, and the cells were cultured at 37°C and 100 rpm for 3 h before being applied to the corresponding antibiotic plates.

### Fluorescence Measurement of eGFP

The BlspTE strain was cultured overnight at 37°C and 250 rpm, and 3% culture was inoculated into the fermentation broth. After 8 h of growth, 15 g/L trehalose was added for inducible expression. The sample was measured for OD<sub>600</sub> and fluorescence intensity after 16 h of adding trehalose. Then, 100 µL of fermentation broth was centrifuged to obtain the cell pellet, then the cell pellet was rinsed twice with phosphate buffered saline (PBS) solution at pH 7.4, and the final OD<sub>600</sub> was diluted to 0.5. Next, 200 µL of diluted suspension was added to the 96-well microtiter plate (Corning). The 96-well microtiter plate was placed in a TECAN-SparK plate reader (Tecan, Männedorf, Switzerland), which calculated the final value using an absorption wavelength of 485 nm, excitation wavelength of 535 nm, and gain value of 100. The formula FI (AU/OD) = 2×(FVt-FVr), where FVt refers to the fluorescence value measured by the target strain, and FVr represents the fluorescence value measured by the control strain BlspE, was used to evaluate the fluorescence intensity.

### Electrophoretic Mobility Shift Assays

DNA probes were amplified using high-fidelity DNA polymerase (Vazyme Biotech Co., Ltd. 2 × Phanta Master Mix) and primers were labeled with biotin. Biotin-labeled probes were purified by agarose gel electrophoresis. 10 nM biotin-labeled probes were incubated with different concentrations of CcpA in binding buffer (10 mM Tris-HCl (pH 7.4), 1 mM DTT, 1 mM EDTA, 50 mM KCl, 0.05 µg/µL poly (dI-dC), 1 mM MgCl<sub>2</sub>), and the reaction solution was put through a full reaction at 25°C for 20 min. After the reaction was completed, the samples were separated by electrophoresis using 4% acrylamide gels in 0.5 × Tris-borate EDTA (TBE) buffer. The samples were electroblotted from the acrylamide gels onto nylon membrane (Beyotime, FFN15), and immobilized by UV crosslinking. The nylon membrane was washed and detected using Chemiluminescent EMSA Kit (Beyotime, GS009) according to manufacturing protocol. Gel imaging and analysis were performed using ChemiDoc XRS (Bio-Rad, U.S.A).

### Statistical analysis

The sample size was  $n \geq 3$  for biology experiments. A student's tests ( $*P \leq 0.05$ ;  $**P \leq 0.01$ ,  $***P \leq 0.001$ ) were performed for statistical analysis.

Fig. S1

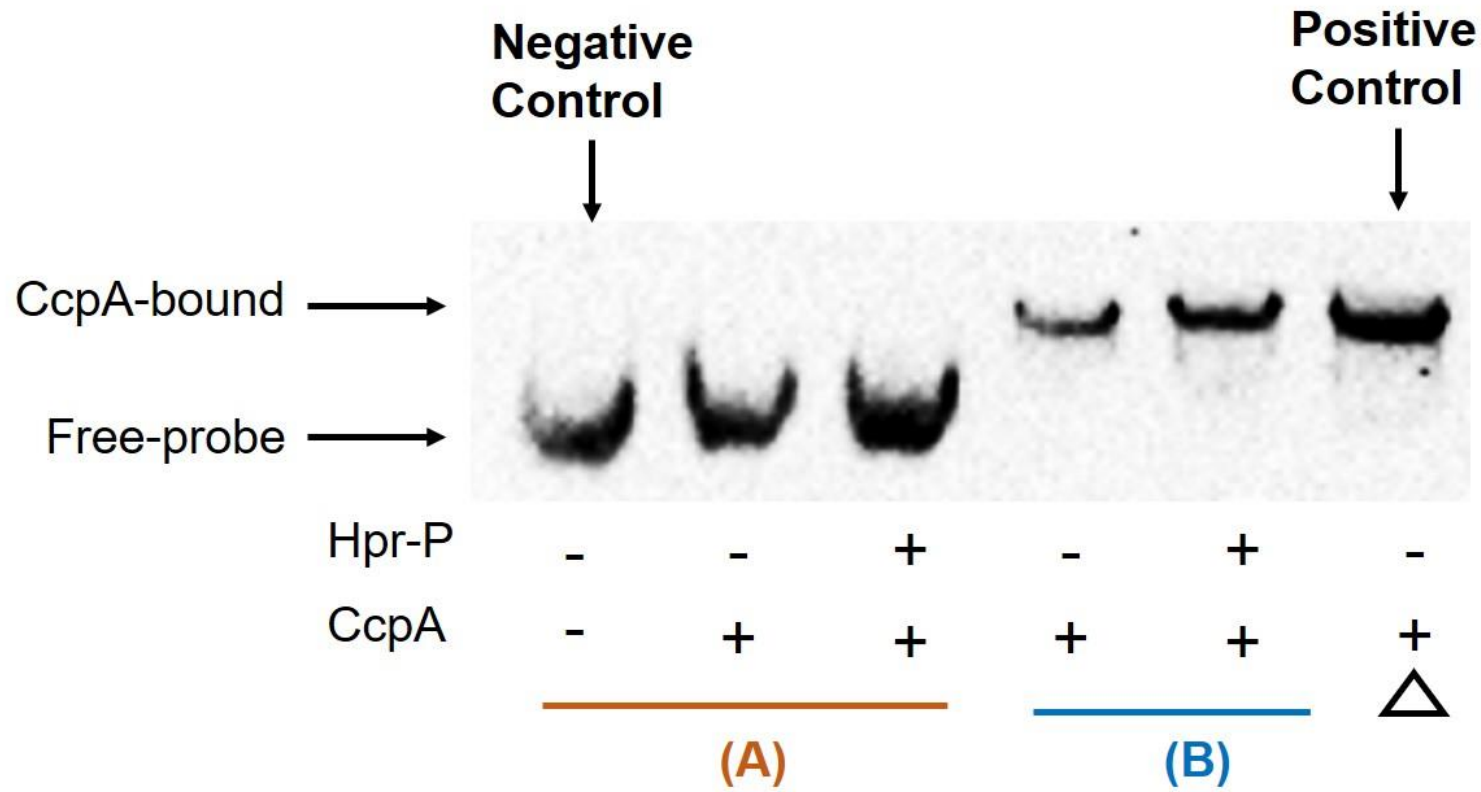

Figure S1: EMSA of CcpA or CcpA-Hpr-P protein for fragment A and B. Related to Figure 1.

The *hpr* (c16360) gene of *Bacillus licheniformis* CICIM B1391 was cloned and then inserted into pET28a vector (between *NdeI* and *EcoRI*), to obtain the gene expression vector of pET28a-*hpr*. The recombinant strain *E.coli* BL21 (DE3) containing expression vector was grown overnight in 15 mL LB-Kanamycin at 37°C, 200 rpm. A 3 % of the culture was inoculated into Terrific Broth (TB) at 37°C until OD600 of 0.4-0.5. The Hpr protein was induced by 0.1mM IPTG for 10 h at 25°C. The cells were collected by centrifugation at 8,000 × g for 5 min. The Hpr protein was purified by the Kit (Mag-Beads His-Tag Protein Purification, Sangon Biotech, C650033) according to the manufacture's protocols. The purify of the Hpr Protein was analyzed through Tris-Tricine SDS PAGE.

Hpr protein phosphorylation was performed in 20 mM Tris-Cl buffer (pH 7.0) supplemented with 1 mM MgCl<sub>2</sub>, 2 mM NaCl and 5 mM ATP. 27 µg Hpr protein and 0.15 µg HprK protein was added to the reaction system at 37°C for 10 min. The reaction was ended at 75°C for 5 min. 10% phos-tag SDS PAGE (Boppard, 193-16711) was used to determine whether Hpr phosphorylation.

The EMSA Lane (left→right): 10 nM fragment A; 1.2µM CcpA+10 nM fragment A; 1.2 µM CcpA +1.2 µM Hpr-P+10 nM fragment A; 1.2µM CcpA+10 nM fragment B; 1.2 µM CcpA +1.2 µM Hpr-P+10 nM fragment B; 1.2µM CcpA + 10 nM Positive control probe.

Fig. S2

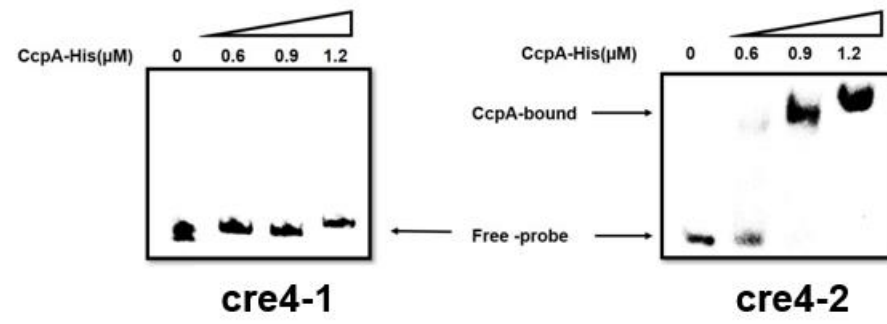

Figure S2: EMSA of CcpA protein binding to two fragments (E6, E7) labelled with 5'-biotin. Related to Figure 1.

Fragment E6 and Fragment E7, containing cre4-1 (AGCGTT-aaggaacttcaga-AACGCT) and cre4-2 (AGCTTT-aaggaacttcaga-AAAGCT). Increasing concentrations of CcpA (0  $\mu\text{M}$ , 0.6  $\mu\text{M}$ , 0.9  $\mu\text{M}$ , 1.2  $\mu\text{M}$ ) were incubated with 10 nM E6 or E7 before the reaction run on EMSA gel.

Fig. S3

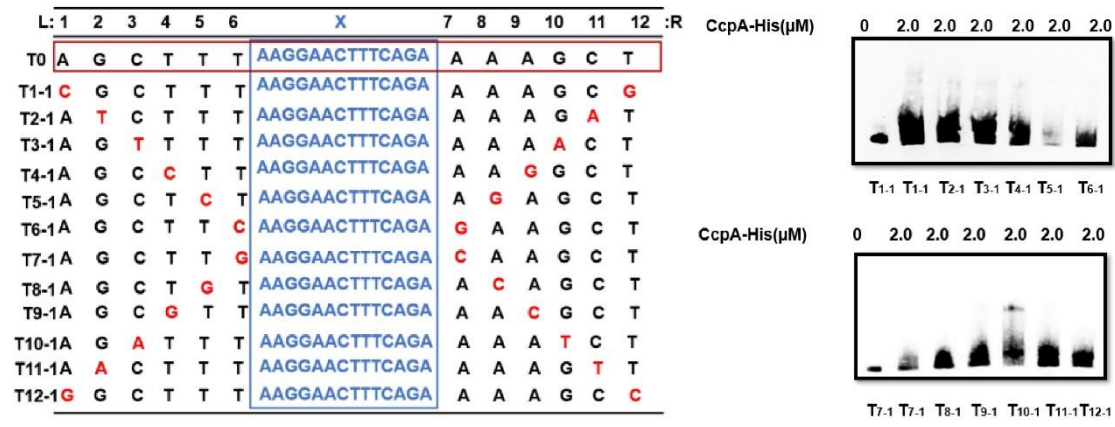

Figure S3: Nucleotide mutations within the 12-bp symmetrical regions of CRE<sub>Trc</sub>. Related to Figure 3.

Two symmetrical bases in symmetrical regions were mutated based on fragment H1, resulting 12 derivative probes (T1-1, T2-1, T3-1, T4-1, T5-1, T6-1, T7-1, T8-1, T9-1, T10-1, T11-1, and T12-1). 2.0 μM CcpA was incubated with 10 nM T1-1, T2-1, T3-1, T4-1, T5-1, T6-1, T7-1, T8-1, T9-1, T10-1, T11-1, and T12-1 before the reaction run on EMSA gel.

Fig. S4

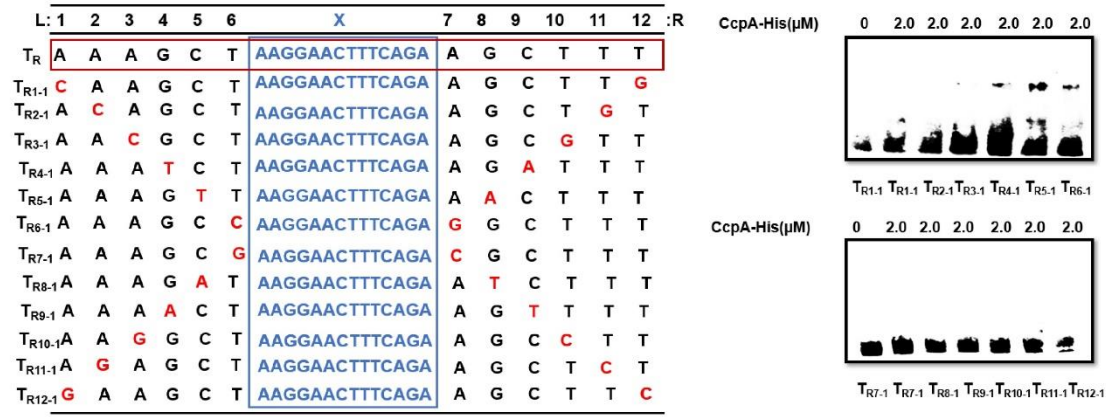

Figure S4: Further point mutation of the 12-bp symmetrical region of CRE<sub>Tre(R)</sub>. Related to Figure 6.

Two symmetrical bases in symmetrical regions were mutated based on fragment H1, resulting 12 derivative probes (TR1-1, TR2-1, TR3-1, TR4-1, TR5-1, TR6-1, TR7-1, TR8-1, TR9-1, TR10-1, TR11-1, and TR12-1). 2.0 μM CcpA was incubated with 10 nM (TR1-1, TR2-1, TR3-1, TR4-1, TR5-1, TR6-1, TR7-1, TR8-1, TR9-1, TR10-1, TR11-1, and TR12-1), and T12-1 before the reaction run on EMSA gel.

Fig. S5

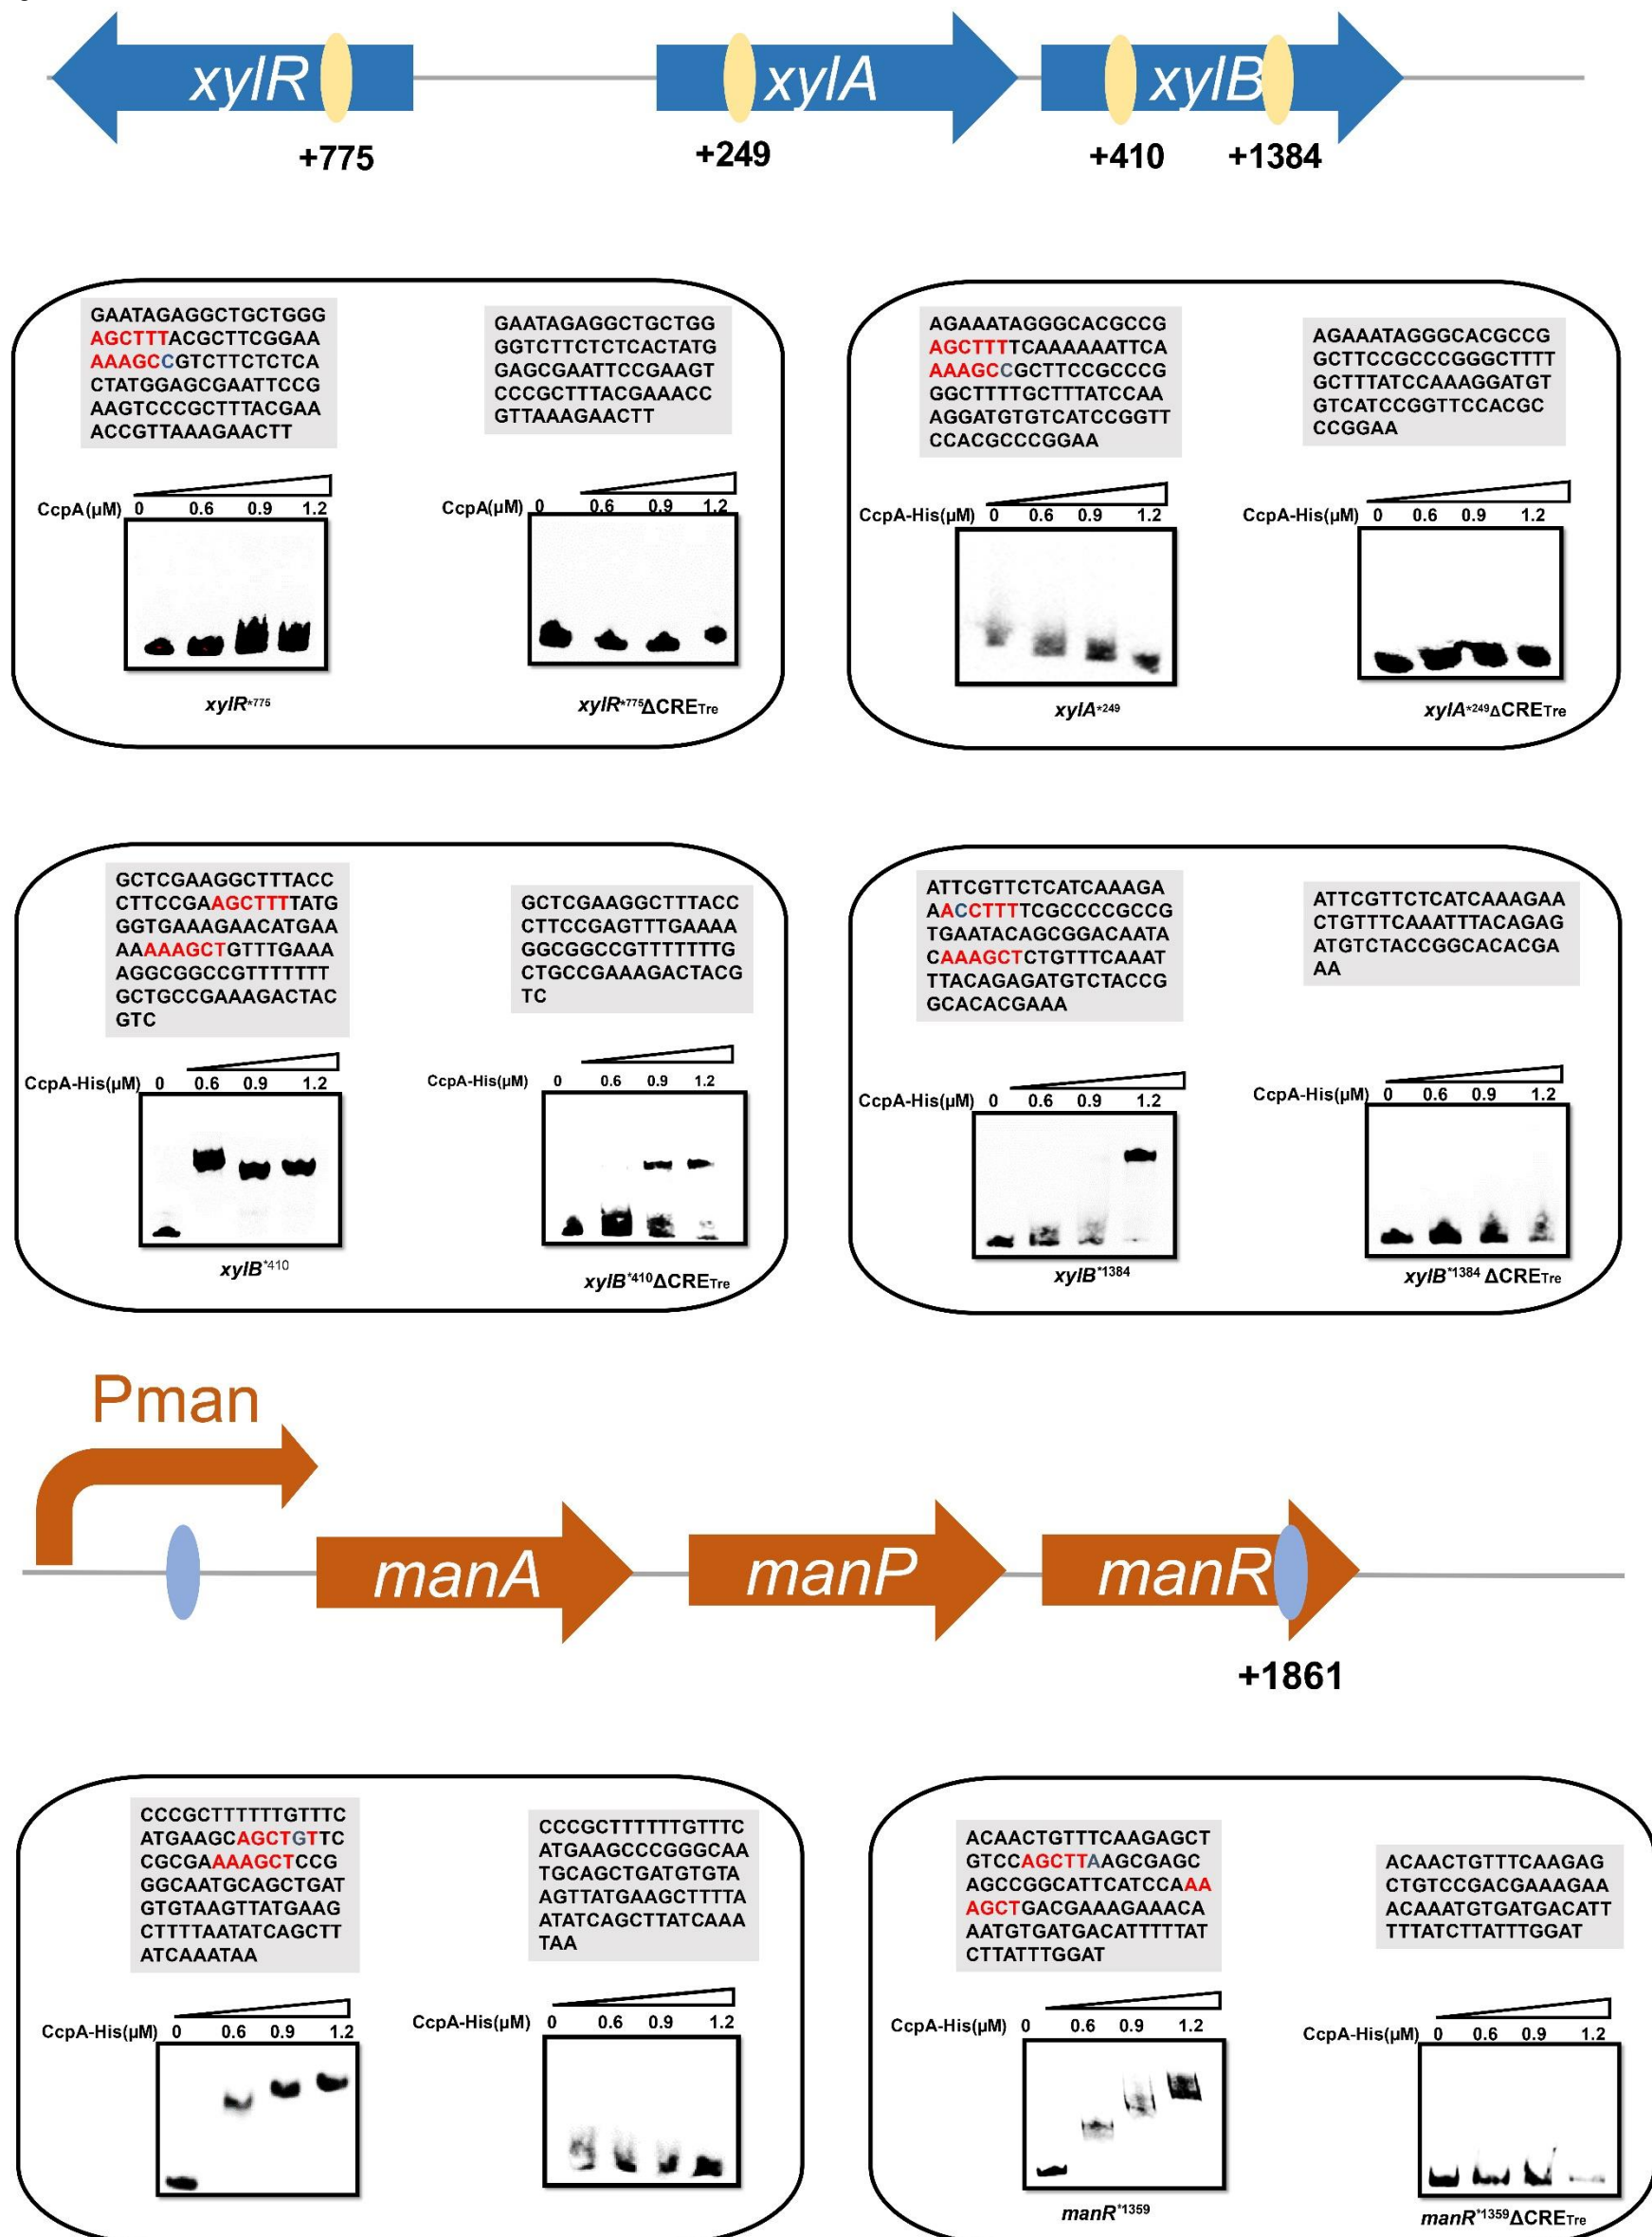

Figure S5: Potential CRE<sub>Tre</sub> sites in xylose operon and mannose operon. Related to Figure 8.

The putative CRE<sub>Tre</sub> was annotated with red. Increasing concentrations of CcpA (0 μM, 0.6 μM, 0.9 μM, 1.2 μM) were incubated with 10 nM fragments before the reaction run on EMSA gel.



Table S1

Bacterial Strains and Plasmids Used in This Study. Related to Figure 4.

| Strain or plasmid                         | Description                                                                                                                               | Reference            |
|-------------------------------------------|-------------------------------------------------------------------------------------------------------------------------------------------|----------------------|
| Strains                                   |                                                                                                                                           |                      |
| <i>Escherichia coli</i> JM109             | F', traD36, proAB + lacIq, Δ(lacZ), M15/Δ (lac-proAB), gln V44, e14 <sup>-</sup> , gyrA96, recA1, relA1, endA1, thi, hsdR17 (CICIM B0012) | CICIM-CU             |
| <i>Bacillus licheniformis</i> CICIM B1391 | wild-type (CICIM B1391)                                                                                                                   | CICIM-CU             |
| <i>Bacillus licheniformis</i> CA          | <i>B. licheniformis</i> CICIM B1391, Δ <i>ccpA</i>                                                                                        | Laboratory construct |
| BlspHY                                    | <i>B. licheniformis</i> CICIM B1391, harboring pHY300-PLK                                                                                 | this work            |
| BlspE                                     | <i>B. licheniformis</i> CICIM B1391, harboring pE                                                                                         | this work            |
| BlspTE                                    | <i>B. licheniformis</i> CICIM B1391, harboring pBLTE                                                                                      | this work            |
| BlspT1E                                   | <i>B. licheniformis</i> CICIM B1391, harboring pBLT1E                                                                                     | this work            |
| BlspT2E                                   | <i>B. licheniformis</i> CICIM B1391, harboring pBLT2E                                                                                     | this work            |
| BlspDE                                    | <i>B. licheniformis</i> CICIM B1391, harboring pBLDE                                                                                      | this work            |
| BlspAE                                    | <i>B. licheniformis</i> CICIM B1391, harboring pBLAE                                                                                      | this work            |
| BlspHY1                                   | <i>B. licheniformis</i> CA, harboring pHY300-PLK                                                                                          | this work            |
| BlspE1                                    | <i>B. licheniformis</i> CA, harboring pE                                                                                                  | this work            |
| BlspTE1                                   | <i>B. licheniformis</i> CA, harboring pBLTE                                                                                               | this work            |
| BlspT1E1                                  | <i>B. licheniformis</i> CA, harboring pBLT1E                                                                                              | this work            |
| BlspT2E1                                  | <i>B. licheniformis</i> CA, harboring pBLT2E                                                                                              | this work            |
| BlspDE1                                   | <i>B. licheniformis</i> CA, harboring pBLDE                                                                                               | this work            |
| BlspAE1                                   | <i>B. licheniformis</i> CA, harboring pBLAE                                                                                               | this work            |
| Plasmids                                  |                                                                                                                                           |                      |
| pMD18-T-simple                            | <i>E. coli</i> cloning vector, Ap <sup>R</sup>                                                                                            | TaKaRa               |
| pHY300-PLK                                | <i>E. coli/Bacillus</i> shuttle vector, Ap <sup>R</sup> /Tet <sup>R</sup>                                                                 | TaKaRa               |
| pE                                        | pHY300-PLK derivative with egfp                                                                                                           | this work            |
| pBLTE                                     | pE derivative with <i>PtreA</i> from <i>B. licheniformis</i> CICIM B1391                                                                  | this work            |
| pBLT1E                                    | pE derivative with <i>PtreA</i> , in which CRE site 'TGAAAGCGCTATAA' was changed to 'AGCTTT-AT-AAAGCT'                                    | this work            |
| pBLT2E                                    | pE derivative with <i>PtreA</i> , in which CRE site 'TGAAAGCGCTATAA' was changed to 'AAAGCT-AT-AGCTTT'                                    | this work            |
| pBLDE                                     | pE derivative with <i>PdnaP</i> from <i>B. licheniformis</i> CICIM B1391                                                                  | this work            |
| pBLAE                                     | pE derivative with P5A2 from <i>B. licheniformis</i> CICIM B1391                                                                          | this work            |

Ap<sup>R</sup>, ampicillin resistance; Tet<sup>R</sup>, tetracycline resistance; Kan<sup>R</sup>, kanamycin resistance

CICIM-CU: Culture and Information Center of Industrial Microorganisms of China Universities.

Table S2

Primers Used to Construct Recombinant Plasmids. Related to Figure 4.

| Primers                | Sequence (5'-3')                             | Restriction site |
|------------------------|----------------------------------------------|------------------|
| eGFPF                  | CCGCTCGAGatgggtcgcgatccatg                   | XhoI             |
| eGFPR                  | TCCCCCGGGtcacacgtggtggtg                     | SmaI             |
| PtreA-F                | CCCAGCTTatctcagccggtgttcc                    | HindIII          |
| PtreA-R                | CCGCTCGAGttccaatccctctctc                    | XhoI             |
| PtreA-CRETre-F         | AGCTTTATAAAGCTaaatatgttgactactgt             |                  |
| PtreA-CRETre-R         | AGCTTTATAAAGCTaaaataaaaaagcccg               |                  |
| PtreA-CRETre(R)-F      | AAAGCTATAGCTTTaaatatgttgactactgt             |                  |
| PtreA-CRETre(R)-R      | AAAGCTATAGCTTTaaaataaaaaagcccg               |                  |
| PdanP-F                | CCCAGCTTaccgttaggtagcgaatcga                 | HindIII          |
| PdnaP-R                | CCGCTCGAGcggcctgaacactctatata                | XhoI             |
| P5A2-F                 | CCCAGCTTaggagggggaaagctaaat                  | HindIII          |
| P5A2-R                 | CCGCTCGAGctaggattttacctcccttc                | XhoI             |
| treR-199-F             | atgaagatcaacaagtatat                         |                  |
| treR-169-F             | aaacaaattgcagaacaaat                         |                  |
| treR-139-F             | atactgaatgccggagata                          |                  |
| treR-109-F             | gaaaacgaccttgccgaac                          |                  |
| treR-79-F              | tcgagggaaacggttcgga                          |                  |
| treR-49-F              | gtgctgcccagaacggat                           |                  |
| treR-199-R(5'-biotin)  | ctgaccctttcctttgatct                         |                  |
| treR-202-F             | agatcaaaggaaaagggt                           |                  |
| treR-172-F             | tcgtgctgcacagggaga                           |                  |
| treR-142-F             | cggttccggttggtcag                            |                  |
| treR-112-F             | ttcagaaacgcttgca                             |                  |
| treR-82-F              | cgacggtccacgagttcgg                          |                  |
| treR-52-F              | cggatgcatatattcaaaa                          |                  |
| treR-202-R(5'-biotin)  | acgaccgccatacctctt                           |                  |
| treR-196-F             | ttctggagatgaagaggtatg                        |                  |
| treR-196-R(5'-biotin)  | gaccacaatttccttatg                           |                  |
| treR-194-F             | atgccataaggaaattg                            |                  |
| treR-194-R(5'-biotin)  | ctactttctcttctgca                            |                  |
| PtreA-88-F             | atctcagccggtgttcccgc                         |                  |
| PtreA-88-R(5'-biotin)  | aaataaaaaagcccggccg                          |                  |
| PtreA-102-F            | ttgaaagcgctataaaaat                          |                  |
| PtreA-102-R(5'-biotin) | ttccaatccctctctc                             |                  |
| PtreA-102ΔCRE-F        | taaatatgttgactactgt                          |                  |
| tre-26-1-F             | AGCTTTaaggaacttcagaAAAGCTatctcagccggtgttcccg |                  |
| tre-20-2-F             | AGCTTTaaggttcagaAAAGCTatctcagccggtgttcccg    |                  |
| tre-12-3-F             | AGCTTTAAAGCTatctcagccggtgttcccg              |                  |
| tre-26-4-F             | CCCGGgaaggaacttcagaAAAGCTatctcagccggtgttcccg |                  |
| tre-26-5-F             | AGCTTTaaggaacttcagaCCCGGatctcagccggtgttcccg  |                  |
| tre-26-6-F             | CCCGGgaaggaacttcagaCCCGGatctcagccggtgttcccg  |                  |
| tre(R)-26-1-F          | AAAGCTaaggaacttcagaAGCTTTatctcagccggtgttcccg |                  |
| tre(R)-20-2-F          | AAAGCTaaggttcagaAGCTTTatctcagccggtgttcccg    |                  |
| tre(R)-12-3-F          | AAAGCTAGCTTTatctcagccggtgttcccg              |                  |
| tre(R)-26-4-F          | CCCGGgaaggaacttcagaAGCTTTatctcagccggtgttcccg |                  |
| tre(R)-26-5-F          | AAAGCTaaggaacttcagaCCCGGatctcagccggtgttcccg  |                  |
| tre(R)-26-6-F          | CCCGGgaaggaacttcagaCCCGGatctcagccggtgttcccg  |                  |
| T1-F                   | CGCTTTaaggaacttcagaAAAGCTatctcagccggtgttcccg |                  |
| T2-F                   | ATCTTTaaggaacttcagaAAAGCTatctcagccggtgttcccg |                  |
| T3-F                   | AGTTTTaaggaacttcagaAAAGCTatctcagccggtgttcccg |                  |
| T4-F                   | AGCCTTaaggaacttcagaAAAGCTatctcagccggtgttcccg |                  |
| T5-F                   | AGCTCTaaggaacttcagaAAAGCTatctcagccggtgttcccg |                  |
| T6-F                   | AGCTTCaaggaacttcagaAAAGCTatctcagccggtgttcccg |                  |
| T7-F                   | AGCTTTaaggaacttcagaCAAGCTatctcagccggtgttcccg |                  |
| T8-F                   | AGCTTTaaggaacttcagaACAGCTatctcagccggtgttcccg |                  |
| T9-F                   | AGCTTTaaggaacttcagaAACGCTatctcagccggtgttcccg |                  |
| T10-F                  | AGCTTTaaggaacttcagaAAATCTatctcagccggtgttcccg |                  |
| T11-F                  | AGCTTTaaggaacttcagaAAAGTTatctcagccggtgttcccg |                  |
| T12-F                  | AGCTTTaaggaacttcagaAAAGCCatctcagccggtgttcccg |                  |
| TR-1-F                 | CAAGCTaaggaacttcagaAGCTTTatctcagccggtgttcccg |                  |
| TR-2-F                 | ACAGCTaaggaacttcagaAGCTTTatctcagccggtgttcccg |                  |
| TR-3-F                 | AACGCTaaggaacttcagaAGCTTTatctcagccggtgttcccg |                  |
| TR-4-F                 | AAATCTaaggaacttcagaAGCTTTatctcagccggtgttcccg |                  |

|                                |                                                              |
|--------------------------------|--------------------------------------------------------------|
| TR-5-F                         | <a href="#">AAAGTTaaggaacttcagaAGCTTT</a> atctcagccggtgttccc |
| TR-6-F                         | <a href="#">AAAGCCaaggaacttcagaAGCTTT</a> atctcagccggtgttccc |
| TR-7-F                         | <a href="#">AAAGCTaaggaacttcagaCGCTTT</a> atctcagccggtgttccc |
| TR-8-F                         | <a href="#">AAAGCTaaggaacttcagaATCTTT</a> atctcagccggtgttccc |
| TR-9-F                         | <a href="#">AAAGCTaaggaacttcagaAGTTTT</a> atctcagccggtgttccc |
| TR-10-F                        | <a href="#">AAAGCTaaggaacttcagaAGCCTT</a> atctcagccggtgttccc |
| TR-11-F                        | <a href="#">AAAGCTaaggaacttcagaAGCTCT</a> atctcagccggtgttccc |
| TR-12-F                        | <a href="#">AAAGCTaaggaacttcagaAGCTTC</a> atctcagccggtgttccc |
| T1-1-F                         | <a href="#">CGCTTTaaggaacttcagaAAAGCG</a> atctcagccggtgttccc |
| T2-1-F                         | <a href="#">ATCTTTaaggaacttcagaAAAGAT</a> atctcagccggtgttccc |
| T3-1-F                         | <a href="#">AGTTTTaaggaacttcagaAAAAC</a> atctcagccggtgttccc  |
| T4-1-F                         | <a href="#">AGCCTTaaggaacttcagaAAGGCT</a> atctcagccggtgttccc |
| T5-1-F                         | <a href="#">AGCTCTaaggaacttcagaAGAGCT</a> atctcagccggtgttccc |
| T6-1-F                         | <a href="#">AGCTTCaaggaacttcagaGAAGCT</a> atctcagccggtgttccc |
| T7-1-F                         | <a href="#">AGCTTGaaggaacttcagaCAAGCT</a> atctcagccggtgttccc |
| T8-1-F                         | <a href="#">AGCTGTaaggaacttcagaACAGCT</a> atctcagccggtgttccc |
| T9-1-F                         | <a href="#">AGCGTTaaggaacttcagaAACGCT</a> atctcagccggtgttccc |
| T10-1-F                        | <a href="#">AGATTTaaggaacttcagaAAATCT</a> atctcagccggtgttccc |
| T11-1-F                        | <a href="#">AACTTTaaggaacttcagaAAAGTT</a> atctcagccggtgttccc |
| T12-1-F                        | <a href="#">GGCTTTaaggaacttcagaAAAGCC</a> atctcagccggtgttccc |
| TR-1-1-F                       | <a href="#">CAAGCTaaggaacttcagaAGCTTG</a> atctcagccggtgttccc |
| TR-2-1-F                       | <a href="#">ACAGCTaaggaacttcagaAGCTGT</a> atctcagccggtgttccc |
| TR-3-1-F                       | <a href="#">AACGCTaaggaacttcagaAGCGTT</a> atctcagccggtgttccc |
| TR-4-1-F                       | <a href="#">AAATCTaaggaacttcagaAGATTT</a> atctcagccggtgttccc |
| TR-5-1-F                       | <a href="#">AAAGTTaaggaacttcagaAACTTT</a> atctcagccggtgttccc |
| TR-6-1-F                       | <a href="#">AAAGCCaaggaacttcagaGGCTTT</a> atctcagccggtgttccc |
| TR-7-1-F                       | <a href="#">AAAGCGaaggaacttcagaCGCTTT</a> atctcagccggtgttccc |
| TR-8-1-F                       | <a href="#">AAAGATAaggaacttcagaATCTTT</a> atctcagccggtgttccc |
| TR-9-1-F                       | <a href="#">AAAAC</a> TaaggaacttcagaAGTTTTatctcagccggtgttccc |
| TR-10-1-F                      | <a href="#">AAGGCT</a> aaggaacttcagaAGCCTTatctcagccggtgttccc |
| TR-11-1-F                      | <a href="#">AGAGCT</a> aaggaacttcagaAGCTCTatctcagccggtgttccc |
| TR-12-1-F                      | <a href="#">GAAGCT</a> aaggaacttcagaAGCTTCatctcagccggtgttccc |
| <i>xyIB</i> -410-F             | agctttatgggaaagaaca                                          |
| <i>xyIB</i> -410ΔCRETre-F      | gttgaaaaggcggccgt                                            |
| <i>xyIB</i> -410-R(5'-biotin)  | attcgctgtgaagacgcc                                           |
| <i>xyIB</i> -1384-F            | acctttcgccccgccgtga                                          |
| <i>xyIB</i> -1384ΔCRETre-F     | ctgttcaaatttacagaga                                          |
| <i>xyIB</i> -1384-R(5'-biotin) | ttattcccgaagctcgcca                                          |
| <i>xyIR</i> -775-F             | agctttacgcttcggaaaaagc                                       |
| <i>xyIR</i> -775ΔCRETre-F      | gtcttctcactatggag                                            |
| <i>xyIR</i> -775-R(5'-biotin)  | gaaaccgttaaagaactgc                                          |
| <i>xyIA</i> -249-F             | agctttcaaaaaattca                                            |
| <i>xyIA</i> -249ΔCRETre-F      | gcttcgcccgggctttt                                            |
| <i>xyIA</i> -249-R(5'-biotin)  | atgacacatccttgataaagc                                        |
| <i>levR</i> -1359-F            | agctttttaatcagaaaat                                          |
| <i>levR</i> -1359ΔCRETre-F     | tcaaaaccacagctgtca                                           |
| <i>levR</i> -1359-R(5'-biotin) | aattaaaggaagtcgctgaa                                         |
| <i>manR</i> -1359-F            | agctttggatgaatgccg                                           |
| <i>manR</i> -1359ΔCRETre-F     | ggacagctctgaaacagt                                           |
| <i>manR</i> -1359-R(5'-biotin) | ctttatgctggctgtcaaac                                         |
| Ptre--48-F                     | cgctttcaaaaataaaaaaa                                         |
| Ptre--71-F                     | cggccgttccctcataa                                            |
| Ptre--48-R(5'-biotin)          | atctcagccggtgttccc                                           |

---
